1 Research Article

2 **Screening of candidate substrates and coupling ions of transporters by thermostability**

3 **shift assays**

4

5 Homa Majd<sup>1</sup>, Martin S. King<sup>1</sup>, Shane M. Palmer<sup>1</sup>, Anthony C. Smith<sup>1</sup>, Liam D.H. Elbourne<sup>3</sup>,

6 Ian T. Paulsen<sup>3</sup>, David Sharples<sup>2</sup>, Peter J. F. Henderson<sup>2</sup>, Edmund R. S. Kunji<sup>1, \*</sup>

7

8 <sup>1</sup>Medical Research Council Mitochondrial Biology Unit, University of Cambridge, Wellcome

9 Trust/MRC Building, Cambridge Biomedical Campus, Hills Road, Cambridge, CB2 0XY, United

10 Kingdom

11 <sup>2</sup>Astbury Centre for Structural Molecular Biology and School of BioMedical Sciences,

12 University of Leeds, Leeds, LS2 9JT, United Kingdom

13 <sup>3</sup>Department of Molecular Sciences, Macquarie University, Sydney, NSW 2109, Australia

14

15 \* Author to whom correspondence should be addressed:

16 Tel.: + 44 1223 252850, Fax.: + 44 1223 252875, e-mail: [ek@mrc-mbu.cam.ac.uk](mailto:ek@mrc-mbu.cam.ac.uk)

17

18 Word count: 3,000 of 5,000 max

19 Number of figures: 4

20 Number of tables: 0

21

22 **Key words:** membrane transport proteins, substrate binding, permeases, solute carriers,  
23 identification

24 **Abstract**

25 Substrates of most transport proteins have not been identified, limiting our understanding  
26 of their role in physiology and disease. Traditional identification methods use transport  
27 assays with radioactive compounds, but they are technically challenging and many  
28 compounds are unavailable in radioactive form or are prohibitively expensive, precluding  
29 large-scale trials. Here, we present a high-throughput screening method that can identify  
30 candidate substrates from libraries of unlabeled compounds. The assay is based on the  
31 principle that transport proteins recognize substrates through specific interactions, which  
32 lead to enhanced stabilization of the transporter population in thermostability shift assays.  
33 Representatives of three different transporter (super)families were tested, which differ in  
34 structure as well as transport and ion coupling mechanisms. In each case, the substrates  
35 were identified correctly from a large set of chemically related compounds, including  
36 stereo-isomers. In some cases, stabilization by substrate binding was enhanced further by  
37 ions, providing testable hypotheses on energy coupling mechanisms.

38

## 39 **Introduction**

40 Transport proteins, also called transporters, porters, carriers, translocases or permeases,  
41 encompass a diverse and ubiquitous group of membrane proteins that facilitate the  
42 translocation of ions and molecules across all types of biological membranes, linking  
43 biochemical pathways, maintaining homeostasis and providing building blocks for growth  
44 and maintenance. They comprise 5-15% of the genomic complement in most organisms.  
45 Transport proteins are classified into four major groups; primary active transporters,  
46 secondary active transporters, facilitative transporters, and channels. Human solute  
47 transport proteins have been divided into 65 subfamilies (based on sequence alignments or  
48 experimentally determined substrate specificities), which transport a diverse range of  
49 compounds, including amino acids, sugars, nucleotides, lipids, vitamins, hormones,  
50 inorganic and organic ions, metals, xenobiotics and drugs (<http://slc.bioparadigms.org/>). Of  
51 the 538 identified solute transport proteins in humans, more than a quarter have no  
52 assigned substrate specificity (<http://slc.bioparadigms.org/>). Consequently, their role in  
53 human physiology is ill-defined and opportunities for drug intervention are missed (Hediger  
54 et al., 2013). Currently, about half of the transport proteins have been associated with  
55 human disease (Rask-Andersen et al., 2013; Hediger et al., 2013; Lin et al., 2015), but only  
56 12 classes of drugs target them directly, despite their inherent 'druggability' (Hediger et al.,  
57 2013; Lin et al., 2015; Cesar-Razquin et al., 2015; Fauman et al., 2011). The situation is not  
58 better in other eukaryotic organisms and bacterial pathogens, currently on the WHO list  
59 **(Supplementary Table1)** (Elbourne et al., 2017). For most transporters in the sequence  
60 databases the identifications are preliminary because they are based only on sequence

61 homology without direct experimental evidence for the substrates, even though single  
62 amino acid residue variations in the substrate binding site can alter the specificity  
63 profoundly. Moreover, the substrate specificities of some transporters may have been  
64 incompletely or incorrectly assigned. Finally, there could be membrane proteins with  
65 unassigned function that belong to unidentified transporter families, which are not counted  
66 at all.

67         One of the major challenges is to find the correct substrates from a large number of  
68 potential candidates. There are approximately ~3,000 metabolites in *E. coli* (Sajed et al.,  
69 2016), ~16,000 in *S. cerevisiae* (Ramirez-Gaona et al., 2017), ~40,000 in *Homo sapiens*  
70 (Wishart et al., 2013), and plants must have even more as they carry out an extensive  
71 secondary metabolism. Some metabolites, such as vitamin B<sub>6</sub>, have several interconvertible  
72 species, each of which could be transported. The classical method to identify transport  
73 proteins monitors the accumulation of radiolabeled compounds in whole cells, membrane  
74 vesicles or proteoliposomes. However, these experiments can easily fail when the  
75 expressed transporters are not active due to targeting, insertion or folding issues, when  
76 they are unstable in purification and reconstitution experiments, or when substrate and  
77 coupling ion gradients are not setup correctly. Moreover, some compounds are not  
78 available in radioactive form or are prohibitively expensive, preventing large-scale  
79 identification trials. Given all these technical difficulties, it is often necessary to limit the  
80 number of candidate substrates first by using phylogenetic analysis, by analyzing  
81 phenotypic (patho)physiological data, by complementation studies or by metabolic analysis  
82 of knock-out or mutant strains.

83           Therefore, there is an unmet demand for the development of new methods to limit  
84 the number of potential substrates for identification of solute carriers. Here, we present a  
85 high-throughput screening method for the identification of substrates of transporters,  
86 which does not require radioactive compounds or prior knowledge. The method uses the  
87 simple concept that transporters recognize their substrates through specific interactions,  
88 enhancing their stabilization in thermostability shift assays. We verify the approach by  
89 defining the substrate specificity of three solute carriers from different bacterial and  
90 eukaryotic protein families and show that these experiments also provide valuable clues  
91 about the ion coupling mechanism.

92

## 93 **Results**

### 94 **Principle of the method**

95 Ligands, such as substrates or inhibitors, are recognized by transport proteins through  
96 specific interactions at the exclusion of other molecules. The formation of these additional  
97 bonds leads to an increase in the total number of interactions (Robinson and Kunji, 2006;  
98 Yan, 2017; Yamashita et al., 2005). Consequently, binding leads to an overall increase in the  
99 stability of the ligand-bound species compared to the unliganded species in the population  
100 of protein molecules. We have previously shown that the mitochondrial ADP/ATP carrier  
101 (AAC) from the thermophilic fungus *Thermothelomyces thermophila* (UniProt G2QNH0)  
102 when purified in dodecyl-maltoside is stabilized upon binding of its specific inhibitors  
103 carboxyatractyloside and bongkreic acid in thermostability shift assays using the thiol-  
104 reactive fluorophore N-[4- (7-diethylamino-4-methyl-3-coumarinyl)-phenyl]-maleimide

105 (CPM) (Crichton et al., 2015; King et al., 2016). In the assay, the apparent melting  
106 temperature  $T_m$  of a population of purified transporters is determined by monitoring the  
107 increase in fluorescence by CPM reacting with thiols that have become exposed due to  
108 thermal denaturation of the proteins (**Fig. 1a**). The apparent melting temperature  $T_m$  is the  
109 temperature at which the rate of unfolding for a given population is highest. We tested  
110 whether transported substrates can also cause a shift in thermostability, as their properties  
111 differ quite substantially from those of inhibitors or other tight binders. Transported  
112 substrates bind only transiently and relatively weakly, leading to a conformational change  
113 that in turn causes the release of the substrate on the other side of the membrane, so it  
114 was not obvious that this approach would work. However, the thermostability of the AAC  
115 population was enhanced in the presence of ADP and ATP, but not in the presence of AMP,  
116 which reflects the known substrate specificity of the carrier well (Mifsud et al., 2013) (**Fig.**  
117 **1b**). This effect is only observed at high concentrations of the substrate, well above the  
118 apparent  $K_m$  of transport (**Supplementary Fig. 1**). The higher the substrate concentration,  
119 the higher the likelihood that part of the population is prevented from unfolding by binding  
120 of the substrate, leading to the observed shift in thermostability. We reasoned that this  
121 approach could be applied as a screening method to find substrate candidates of  
122 uncharacterized transporters by using compound libraries. To verify the method, we have  
123 tested transporters from three different (super)families, which are distinct in structure and  
124 transport mechanism.

125

126 **Substrates cause specific thermostability shifts in different transporters**

127 The galactose transporter GalP of *E. coli* (Henderson, 1977) is a prototypical member of the  
128 sugar porter family that belongs to the major facilitator superfamily (MFS) (Pao et al., 1998).  
129 Currently, the MFS contains 24 different transporter families and 320,665 sequence entries  
130 from 5224 species, but the substrates for the vast majority of them have not been formally  
131 identified (Pfam CL0015). In humans, 14 of the 65 solute carrier families belong to the MFS,  
132 and substrates are not known for around 12% of them (<http://slc.bioparadigms.org/>).

133 The structure of GalP has not been determined, but those of its mammalian homologs  
134 GLUT1 (Deng et al., 2014), GLUT3 (Deng et al., 2015), and GLUT5 (Nomura et al., 2015) are  
135 available (**Fig. 2a**). GalP contains three cysteine residues, of which only one is readily  
136 accessible to reaction with *N*-ethylmaleimide (McDonald and Henderson, 2001). To  
137 evaluate the strategy, we measured the unfolding curves of purified GalP in dodecyl-  
138 maltoside in the presence of a large number of different sugars. We determined the  
139 temperature shift by subtracting the apparent  $T_m$  of unliganded GalP ( $57.6 \pm 0.3$  °C) from  
140 the apparent  $T_m$  values observed in the presence of compounds ( $\Delta T_m$ ) (**Supplementary Fig.**  
141 **2**). The GalP population was markedly stabilized by D-glucosamine ( $\Delta T_m$ ;  $5.7 \pm 0.4$  °C), D-  
142 glucose ( $\Delta T_m$ ;  $4.2 \pm 0.5$  °C), D-galactose ( $\Delta T_m$ ;  $2.1 \pm 0.6$  °C), and to a lesser extent by D-talose,  
143 2-deoxy-D-glucose, 6-deoxy-D-glucose. Importantly, the related L-isomers showed no  
144 significant shift (**Fig. 2b**). These results match the known substrate specificity of GalP well  
145 (Henderson and Maiden, 1990; Walmsley et al., 1994). D-Glucosamine, the most stabilizing  
146 compound, had not been investigated previously, but transport assays showed that this  
147 compound is a new substrate (**Supplementary Fig. 3**), demonstrating that the assay can be  
148 used to discover as well as to extend the substrate specificity of transport proteins.

149           The transport protein Mhp1 from *Microbacterium liquefaciens* (Uniprot D6R8X8)  
150 transports 5-substituted hydantoins in a sodium-coupled mechanism (Suzuki and  
151 Henderson, 2006; Shimamura et al., 2010) (**Fig 2c**), and is a member of the nucleobase-  
152 cation-symport family of homologous proteins that also transport purines, pyrimidines,  
153 vitamins and related metabolites. The transporter has the LeuT-fold (Shimamura et al.,  
154 2010; Yamashita et al., 2005) and belongs to the amino acid-polyamine-organocation  
155 superfamily (Vastermark and Saier, 2014), which currently contains 20 families and 147,819  
156 sequence entries, the substrates of which have mostly not been identified (Pfam CL0062).  
157 Mhp1 contains three cysteine residues, of which only one is readily accessible to reaction  
158 with *N*-ethylmaleimide (Calabrese et al., 2017). Purified Mhp1 in dodecyl-maltoside had an  
159 apparent  $T_m$  of  $51.3 \text{ }^\circ\text{C} \pm 0.6 \text{ }^\circ\text{C}$  (**Supplementary Fig. 4**) and to test the binding specificity,  
160 the  $\Delta T_m$  was determined upon addition of different nucleobases and other compounds (**Fig.**  
161 **2d**). The only stabilizing compounds were 5-indolylmethyl-L-hydantoin ( $\Delta T_m$ ;  $14.1 \pm 1.2 \text{ }^\circ\text{C}$ ),  
162 5-benzyl-L-hydantoin ( $\Delta T_m$ ;  $13.6 \pm 1.2 \text{ }^\circ\text{C}$ ) and 5-bromovinylhydantoin ( $\Delta T_m$ ;  $11.9 \pm 1.1 \text{ }^\circ\text{C}$ ).  
163 A chemically related inhibitor of Mh1p, 5- (2-naphthylmethyl)-L-hydantoin (L-NMH) also led  
164 to a thermostability shift ( $\Delta T_m$ ;  $15.6 \pm 1.7 \text{ }^\circ\text{C}$ ). These results match the known substrate and  
165 inhibitor specificity of Mhp1 (Simmons et al., 2014), showing that the assay could identify  
166 substrates from a set of closely related compounds without false positives.

167           To validate the method further, we also screened the mitochondrial ADP/ATP carrier  
168 from *T. thermophila* (UniProt G2QNH0) (King et al., 2016) (**Fig. 2e**). This transport protein  
169 belongs to the mitochondrial carrier family (MCF), which is involved in the translocation of  
170 chemically diverse compounds across the mitochondrial inner membrane, using uniport,



171 symport or antiport modes of transport (Kunji, 2012). Currently, there are 89,340 different  
172 sequence entries from 831 different species in the database (Pfam PF00153). In humans,  
173 the MCF is the largest solute carrier family with 53 different members (SLC25), but the  
174 substrate specificity of only half of them has been defined (Kunji, 2012). We screened the  
175 thermostability of purified AAC using a library of mitochondrial compounds  
176 (**Supplementary Fig. 5**). In the presence of ATP, ADP, and dADP the population was  
177 stabilized, showing  $\Delta T_m$  values of  $7.2 \pm 0.2$ ,  $6.0 \pm 0.5$  and  $1.8 \pm 0.2$  °C, respectively (**Fig. 1b**  
178 and **2f**). Some other compounds, mostly structurally related nucleotides, also stabilized the  
179 protein, but with significantly smaller shifts (**Fig. 2f**). For each type of nucleotide, the di- and  
180 tri-phosphate species showed larger shifts than the monophosphate forms, similar to the  
181 preference of ATP and ADP over AMP (**Fig. 1d** and **2f**), showing that the assay can also  
182 identify functional groups that are important contributors to substrate binding.

183

#### 184 **Substrate screening of a mitochondrial carrier from *Tetrahymena thermophila***

185 To see whether this method can be used to identify candidate substrates for a previously  
186 uncharacterized transporter, we performed a high-throughput screen on a purified  
187 mitochondrial carrier from the thermophilic ciliate *Tetrahymena thermophila* (UniProt  
188 I7M3J0). The carrier is phylogenetically related to the yeast mitochondrial carrier that  
189 transports inorganic phosphate in symport with a proton into the mitochondrial matrix for  
190 ATP synthesis (Runswick et al., 1987), but its substrates have not been identified  
191 experimentally. The population of carriers had an apparent  $T_m$  of  $56.0 \pm 0.8$  °C and was  
192 screened against a library of 132 different mitochondrial compounds at pH 6.0 (**Fig. 3**). The

193 highest shift in the  $T_m$  of the population was observed for phosphate ( $\Delta T_m$ ;  $4.6 \pm 0.4$  °C),  
194 followed by glyoxylate ( $\Delta T_m$ ;  $3.6 \pm 0.8$  °C), acetyl-phosphate ( $\Delta T_m$ ;  $3.2 \pm 0.5$  °C) and  
195 phosphoenolpyruvate ( $\Delta T_m$ ;  $2.3 \pm 0.2$  °C) (**Supplementary Fig. 6**), whereas small shifts were  
196 observed for nucleotides.

197 These compounds either contain phosphate as a functional group or resemble the structure  
198 of phosphate, such as glyoxylate (**Supplementary Fig. 7**). Thus, this assay can be used to  
199 narrow down substantially the number of potential substrate candidates from a library of  
200 unlabeled compounds.

201

## 202 **The effect of coupling ions**

203 Secondary active transporters are widespread and often use the electrochemical gradient  
204 of protons or other ions to drive the uptake of substrates against their concentration  
205 gradient. Coupling ions are also recognized by transporters through specific interactions,  
206 often directly associated with the binding of substrates (Kunji and Robinson, 2010;  
207 Krishnamurthy et al., 2009).

208 5-Benzyl-L-hydantoin is transported by Mhp1 in symport with sodium ions (Suzuki  
209 and Henderson, 2006; Shimamura et al., 2010) and thus we tested whether the  
210 temperature shifts of Mhp1 induced by substrate binding were ion-dependent. When  
211 different ions were tested, only sodium ions induced a large substrate stabilization, whereas  
212 relatively small stabilizations were observed in the presence of potassium, calcium and  
213 magnesium ions (**Fig. 4a**).

214 Mitochondrial phosphate carriers are proton-driven, coupling phosphate  
215 translocation to proton symport (Kunji and Robinson, 2010). To investigate whether proton-  
216 dependency of substrate binding could be inferred from the assay, the shift in thermal  
217 stability by substrate binding was determined at pH 6.0 and 8.0. The pH can affect the  
218 reaction of maleimide groups of CPM with free thiols and the stability of the protein itself,  
219 but the  $\Delta T_m$  value shows the effect of pH on substrate binding only. In both cases a  
220 substrate-induced stabilization was observed, but the effect was larger in pH 6.0 than in pH  
221 8.0 ( $\Delta T_m$   $4.6 \pm 0.4$  °C and  $2.6 \pm 0.4$  °C, respectively) (**Fig. 4b**).

222 As a control, we carried out the same experiment with the mitochondrial ADP/ATP  
223 carrier, which is not a proton symporter (**Fig. 4c**). The opposite effect was observed;  
224 substrate binding at pH 8.0 led to a bigger thermostability shift than at pH 6.0. The predicted  
225 substrate binding site of AAC has three positively charged residues that interact with the  
226 negatively charged phosphate groups of ADP and ATP (Kunji and Robinson, 2006; Robinson  
227 and Kunji, 2006). ATP has pKa values of 0.9, 1.5, 2.3 and 7.7, whereas ADP has pKa values  
228 0.9, 2.8 and 6.8. This means that the substrates are more negatively charged at pH 8.0  
229 compared to pH 6.0, which will enhance their binding to the positively charged residues of  
230 the substrate binding site, leading to an increase in thermostability. In the case of the  
231 phosphate carrier the situation is very different. Phosphate has pKa values of 2.2, 7.2 and  
232 12.3, and the predicted binding site contains two positively charged residues to neutralize  
233 the two negative charges on phosphate. However, in addition, the binding site contains a  
234 negatively charged glutamate, which has a pKa of  $\sim 4.0$ . Only when this residue is protonated  
235 can binding of the negatively charged phosphate to the site occur (Kunji and Robinson,

236 2010), which occurs more readily at pH 6.0 than at pH 8.0, explaining the difference in  
237 thermostability. These results show that substrate binding stabilizes the transporters, but  
238 that this effect is enhanced further by the presence of coupling ions, providing testable  
239 hypotheses on energy coupling mechanisms.

240

## 241 **Discussion**

242 We have shown that thermostability assays can be used to study the interaction of  
243 substrates with transporters. This is not intuitive, as substrates only bind transiently and  
244 rather weakly in the transport cycle. Still, for diverse types of transport proteins, which  
245 differ in structure and transport mechanism, a shift in thermostability was observed in the  
246 presence of specific substrates. The shift is observed at concentrations well above the  
247 apparent  $K_m$  of transport, as under these conditions a larger part of the protein population  
248 is rescued from unfolding by binding of the substrate, increasing the overall number of  
249 interactions.

250         These studies highlight the different contributions these assays can make to  
251 studying the properties of transport proteins. First, they can be used to limit the number of  
252 potential substrate candidates from libraries of unlabeled compounds, providing important  
253 clues about the substrate specificity (**Fig. 2** and **3**). In the tested cases, the assay correctly  
254 identified the substrates from a set of chemically related compounds, including stereo-  
255 isoforms. Still, these candidates need to be tested by transport or other types of assays, as  
256 the compounds could potentially be inhibitors or regulators. However, no prior knowledge  
257 is required and the number of radioactive compounds that need testing is highly reduced,

258 meaning that it is easier and cheaper to establish a robust transport assay. Second, the  
259 assays can be used to extend the substrate specificity of known transport proteins, as was  
260 shown for GalP with D-glucosamine (**Fig. 2b**). Third, they can be used to identify functional  
261 groups that are key to substrate binding, as shown for AAC, where nucleotide di- and tri-  
262 phosphates bound more tightly than nucleotide monophosphates (**Fig. 2f**). In the case of  
263 mitochondrial phosphate carriers, the common properties of compounds, such as the  
264 phosphate group, may lead directly to the most probable candidates. Fourth, this assay can  
265 provide important clues on the involvement of coupling ions in substrate binding, as shown  
266 for cases where transport is driven by sodium ion or proton symport (**Fig. 4**).

267         This method has major advantages over the traditional methods of identification. It  
268 is highly reproducible and can be performed in a high-throughput manner, allowing  
269 screening of about 100 compounds per machine per hour. The assay requires a relatively  
270 small amount of protein per assay (micrograms), depending on the number of buried  
271 cysteine residues. Another advantage is that the unfolding curves are themselves important  
272 quality checks, as they indicate that the protein is folded and therefore competent to bind  
273 substrate.

274         There are also some limitations, as only proteins that have buried thiols can be used,  
275 although accessible cysteines can be tolerated as they only raise the base line of the assay  
276 without interfering with the unfolding curve. Thiol-containing compounds, such as cysteine  
277 or glutathione, cannot be screened as the probe reacts with them directly. However,  
278 changes in the fluorescence of environmentally-sensitive dyes or endogenous tryptophans  
279 can be used as alternatives to CPM. Furthermore, the assay requires purified and stable

280 transporter in detergent, although partially purified protein might be sufficient. Advances  
281 in bacterial (King et al., 2015; Ward et al., 1999), yeast (Routledge et al., 2016), insect  
282 (Contreras-Gomez et al., 2014), and mammalian (Goehring et al., 2014; Andrell and Tate,  
283 2013) expression systems have allowed many transporters to be expressed in folded and  
284 functional states. Also, robust purification methods and novel classes of ‘stabilizing’  
285 detergents, such as the neopentyl glycol maltoside detergents (Chae et al., 2010), have  
286 allowed even poorly expressed transporters to be purified in the small quantities required  
287 for these studies.

288 Even though the main purpose of this study was to identify potential substrates of  
289 transporters, the assays may also be used in drug discovery or in the identification of  
290 substrates, inhibitors and regulators of any other soluble or membrane proteins with  
291 occluded cysteines.

292

## 293 **Materials and Methods**

### 294 **Materials**

295 Chemicals were obtained from Sigma Aldrich and Thermo Fisher Scientific (USA). Nickel NTA  
296 and sepharose beads were purchased from Qiagen (USA). All enzymes were provided by  
297 New England BioLabs (USA). Lipids were purchased from Avanti Polar Lipids (USA) and  
298 detergents from Anatrace (USA). The hydantoin compounds were a kind gift of Marta Sans,  
299 Maria Kokkinidou and Arwen Pearson (University of Hamburg).

300

### 301 **Protein expression**

302 For expression of mitochondrial ADP/ATP carrier of *Thermothelomyces thermophila* and the  
303 putative phosphate carrier of *Tetrahymena thermophila* in yeast mitochondria, gene  
304 constructs were designed to contain an N-terminal tag composed of eight histidine residues  
305 followed by a Thr-Ser-Glu-Asp linker and an Ile-Glu-Gly-Arg Factor Xa protease cleavage site.  
306 The genes were cloned into pYES3/CT vector (Invitrogen, USA) with a constitutively active  
307 promoter (*pMIR* promoter of the *S. cerevisiae* phosphate carrier). The plasmids were  
308 transformed into *S. cerevisiae* WB.12 (MAT $\alpha$  ade2-1 trp1-1 ura3-1 can1-100 aac1::LEU2  
309 aac2::HIS3) and W303-1B (MAT $\alpha$  leu2-3,112 trp1-1 can1-100 ura3-1 ade2-1 his3-11,15)  
310 strains respectively. Cells were grown in a 50-litre fermenter after which mitochondria were  
311 prepared (Kunji and Harding, 2003).

312 For expression of GalP in *E. coli* the promoter region and the *galP* gene, which was  
313 modified to encode six histidine residues at the C-terminus of the protein, were cloned into  
314 plasmid pBR322 to form plasmid pGP1, which was transformed into the galactose/glucose  
315 transport-deficient host strain JM1100 (*ptsG ptsM ptsF mgl galP Hfr  $\Delta$ his gnd thyA galk*)  
316 (Henderson et al., 1977). Cells were grown in basal salts medium supplemented with 30  
317 mM glycerol, 20  $\mu$ g/ml thymine, 80  $\mu$ g/ml histidine and 15  $\mu$ g/ml tetracycline in a fermenter  
318 (30- or 100-liter scale). The gene *hyuP* from *M. liquefaciens*, modified to encode six histidine  
319 residues at the C-terminus, was cloned into plasmid pTTQ18 (Stark, 1987; Suzuki and  
320 Henderson, 2006). The His<sub>6</sub>-tagged Mhp1 hydantoin transport protein was expressed in *E.*  
321 *coli* BL21 (DE3) grown in M9 medium supplemented with 20 mM glycerol, 20 mM NH<sub>4</sub>Cl,  
322 100  $\mu$ g/ml of carbenicillin, 0.2% w/v casamino acids, 2 mM MgSO<sub>4</sub>.7H<sub>2</sub>O, 0.4 mM  
323 CaCl<sub>2</sub>.2H<sub>2</sub>O, using induction by IPTG in 100-liter fermenter cultures. In all cases after

324 harvesting the intact cells preparations were made of inner membranes (Ward et al., 1999),  
325 which were stored at -80 °C in Tris-HCl buffer pH 7.5 until used for purification of each  
326 individual protein.

### 327 **Protein purification**

328 The mitochondrial ADP/ATP carrier and phosphate carrier were purified using the  
329 detergents dodecyl-maltoside and lauryl maltose neopentyl glycol, respectively, using  
330 established procedures (King et al., 2016).

331 For the purification of His-tagged GalP, *E. coli* membranes were solubilized in buffer  
332 containing 20 mM Tris-HCl pH 8, 20 mM imidazole, 300 mM NaCl, 20% glycerol and 1%  
333 dodecyl-maltoside for 1 h at 4 °C with gentle mixing to a final protein concentration of 2.5  
334 mg/ml. After centrifugation (108,000 x g, 1 h, 4 °C), the supernatant was mixed with pre-  
335 washed nickel-NTA resin and purified by immobilized nickel affinity chromatography (1 ml  
336 resin per 37 mg of total protein; Superflow, QIAGEN) for batch-binding affinity  
337 chromatography for 1 h at 4 °C. Non-specific proteins were removed with buffer containing  
338 20 mM Tris-HCl pH 8, 20 mM imidazole, 150 mM NaCl, 10% glycerol and 0.02% dodecyl-  
339 maltoside, after which His-tagged GalP was eluted with buffer containing 20 mM Tris-HCl  
340 pH 8, 200 mM imidazole, 100 mM NaCl, 5% glycerol and 0.02% dodecyl-maltoside.  
341 Imidazole was then removed by passing the sample through pre-equilibrated PD-10  
342 desalting column (GE Healthcare). Protein samples were snap-frozen and stored in liquid  
343 nitrogen.

344 The purification of Mhp1 followed the same procedure as the GalP purification with  
345 the following modifications. Membranes were solubilized for 2 h and incubated with Nickel



346 NTA resin for 2 h. The wash buffer contained 10 mM Tris-HCl pH 8, 20 mM imidazole, 10%  
347 glycerol and 0.05% dodecyl-maltoside and the elution buffer contained 10 mM Tris-HCl pH  
348 8, 200 mM imidazole, 2.5% glycerol and 0.05% dodecyl-maltoside.

349

### 350 **Transport assays**

351 Robotic transport assays were performed using a Hamilton MicroLab Star robot (Hamilton  
352 Robotics Ltd, UK). For GalP transport assays, *E. coli* cells (GalP-expressing strain  
353 pGP1/JM1100 and JM1100 control strains) were diluted to OD<sub>600</sub> of 20 in MES buffer (5 mM  
354 MES pH 6.6, 150 mM KCl) and incubated at room temperature with 20 mM glycerol for 10  
355 minutes to be energized prior to being loaded into the wells of a MultiScreenHTS+ Hi Flow-  
356 FB (pore size = 1.0 µm, Millipore, USA). Transport assays were initiated by addition of 100  
357 µl of buffer containing 5 µM [<sup>14</sup>C]-galactose (American Radiolabeled Chemicals, 0.20  
358 GBq/mmol) or 5 µM [<sup>14</sup>C]-glucosamine (American Radiolabeled Chemicals, 0.204  
359 GBq/mmol). For the competition assay, radiolabeled substrate was mixed with a 4,000-fold  
360 excess of the competitor compound prior to the assay. The transport was stopped after 0,  
361 10, 20, 30, 45, 60, 150 s and, 5, 7.5 and 10 min incubation times with 200 µl ice-cold buffer  
362 and the samples were filtered and washed as above. Levels of radioactivity were measured  
363 by adding 200 µl MicroScint-20 (Perkin Elmer) and measured with a TopCount scintillation  
364 counter (Perkin Elmer).

365

### 366 **Preparation of the mitochondrial compound library**

367 To identify mitochondrial metabolites every enzyme in the KEGG metabolic database  
368 (Kanehisa et al., 2017) was evaluated for mitochondrial localization using the MitoMiner  
369 database of mitochondrial localization evidence (Smith and Robinson, 2016). A wide range  
370 of data were considered including large-scale experimental evidence from GFP tagging and  
371 mass-spectrometry of mitochondrial fractions, mitochondrial targeting sequence  
372 predictions, immunofluorescent staining from the Human Protein Atlas (Thul et al., 2017),  
373 and annotation from the Gene Ontology Consortium (The Gene Ontology, 2017). Ensembl  
374 Compara allowed these data to be shared across human, mouse, rat and yeast homologs  
375 (Zerbino et al., 2018). Once a list of enzymes with probable mitochondrial localization was  
376 collated, KEGG was used to produce a corresponding list of potential mitochondrial  
377 compounds. Additional candidates were taken from a computer model of mitochondrial  
378 metabolism that manually partitioned metabolites on either side of the mitochondrial inner  
379 membrane (Smith and Robinson, 2011). Compounds were dissolved in PIPES buffer (10 mM  
380 PIPES pH 7.0, 50 mM NaCl) to a final concentration of 25 mM or in dimethyl sulfoxide to a  
381 final concentration of 100 mM. pH was adjusted if necessary and the stocks were frozen at  
382 -80 °C.

383

#### 384 **Analysis of the total number of identified transport protein substrates in different species**

385 The TransportDB database contains a large number of organisms for which the transporter  
386 complement has been identified via a bioinformatic pipeline, along with substrate  
387 predictions for the transporters characterized (Elbourne et al., 2017). To acquire the figures  
388 in Supplementary Table 1, a Perl script driving an SQL query of the underlying MySQL

389 database to TransportDB was developed to quantify those transporters where no prediction  
390 could be made for the substrate for the listed species. The number of transporters with  
391 unassigned specificity represents a minimal number, as the search procedure uses  
392 sequence similarity to characterised transporters as a criterion. However, the substrate  
393 specificity needs to be determined experimentally, as a single mutation in the binding site  
394 can profoundly change substrate recognition.

395

### 396 **Thermostability shift assay and library screening**

397 To determine stability, purified protein (typically 1-3  $\mu\text{g}$ ) was mixed with 20  $\mu\text{g}/\text{ml}$  of the  
398 thiol-reactive fluorophore 7-diethylamino-3-(4'-maleimidylphenyl)-4-methylcoumarin  
399 (CPM) and the fluorescent intensity was measured over a 25-90  $^{\circ}\text{C}$  range of temperature  
400 using a rotatory qPCR multi sample instrument (Rotor-Gene Q, Qiagen, the Netherlands).  
401 Following an initial 18  $^{\circ}\text{C}$  pre-incubation step of 90 s, the temperature was ramped 1  $^{\circ}\text{C}$   
402 every 15 s, with a 4-s wait between readings, which is equal to a ramp rate of 5.6  $^{\circ}\text{C}/\text{min}$ .  
403 The excitation and emission wavelengths were 460 nm and 510 nm, respectively. Five  
404 mg/ml stocks of CPM prepared in dimethyl sulfoxide were diluted to 0.1 mg/ml and  
405 equilibrated in assay buffer for one hour at room temperature in the dark before addition  
406 to the protein sample. The assay buffer was usually the buffer in which the protein was  
407 purified or in a similar buffer with a different pH (MES for pH 6.0, HEPES for pH 8.0) or a  
408 different concentration of other ions. Data analyses and apparent melting temperatures  
409 ( $T_m$ , the inflection point of a melting temperature) were determined using software  
410 supplied with the instrument.

411 For GalP experiments, 500 mM sugar stocks were made in MilliQ water (Merck-  
412 Millipore, USA) as 10 times stocks. For Mhp1 experiments, 100 mM compound stocks were  
413 made in dimethyl sulfoxide as 50 times stocks.

414

#### 415 **Data analyses and representation**

416 Statistical analyses were performed using Microsoft Excel with the inbuilt function of two-  
417 tailed, two-sample unequal variance Student's *t*-test. The average apparent  $T_m$  of 'no ligand'  
418 control samples (three technical repeats within each Rotor-Gene Q run) was subtracted  
419 from the apparent  $T_m$  measured for each compound addition in the same run. This assay  
420 was performed with three or five biological repeats using independent batches of purified  
421 protein. The null hypothesis of the *t*-test was that the observed  $\Delta T_m$  for each compound  
422 was not significantly different from zero.

423

#### 424 **Acknowledgments**

425 This work was supported by grant MC\_UU\_00015/1 of the Medical Research Council, UK.  
426 H.M. gratefully acknowledges the Cambridge Commonwealth, European and International  
427 Trust for support of her PhD studies. PJFH thanks the Leverhulme Trust for an Emeritus  
428 Research Fellowship (Grant number EM-2014 -045). The fermenters and allied equipment  
429 for protein production in Leeds were funded by the BBSRC (MPSI BBS/B/14418), the  
430 Wellcome Trust (JIF 062164/Z/00/Z) and the University of Leeds. The hydantoin derivatives  
431 were a kind gift from Marta Sans, Maria Kokkinidou and Arwen Pearson (University of  
432 Hamburg).

433

434 **Author contributions**

435 H.M. and M.S.K. contributed protein purification and thermostability shift assays; H.M.,  
436 M.S.K. contributed transport assays; S.M.P. and D.S. contributed cell culturing; A.C.S.  
437 contributed the mitochondrial compound library; L.D.H.E and I.T.P contributed  
438 bioinformatics analyses of substrate characterization; H.M., M.S.K., P.J.F.H. and E.R.S.K.  
439 contributed the design of the experiments, analyses of the data and writing of the  
440 manuscript.

441

442 **Competing financial interests**

443 The authors declare no competing interests.

444

445 **References**

- 446 Andrell J, Tate CG 2013. Overexpression of membrane proteins in mammalian cells for  
447 structural studies. *Mol. Membr. Biol.* **30**:52-63. 10.3109/09687688.2012.703703
- 448 Calabrese AN, Jackson SM, Jones LN, Beckstein O, Heinkel F, Gsponer J, Sharples D, Sans  
449 M, Kokkinidou M, Pearson AR, Radford SE, Ashcroft AE, Henderson PJF 2017.  
450 Topological Dissection of the Membrane Transport Protein Mhp1 Derived from  
451 Cysteine Accessibility and Mass Spectrometry. *Anal. Chem.* **89**:8844-8852.  
452 10.1021/acs.analchem.7b01310
- 453 Cesar-Razquin A, Snijder B, Frappier-Brinton T, Isserlin R, Gyimesi G, Bai X, Reithmeier RA,  
454 Hepworth D, Hediger MA, Edwards AM, Superti-Furga G 2015. A Call for Systematic  
455 Research on Solute Carriers. *Cell* **162**:478-87. 10.1016/j.cell.2015.07.022
- 456 Chae PS, Rasmussen SG, Rana RR, Gotfryd K, Chandra R, Goren MA, Kruse AC, Nurva S,  
457 Loland CJ, Pierre Y, Drew D, Popot JL, Picot D, Fox BG, Guan L, Gether U, Byrne B,  
458 Kobilka B, Gellman SH 2010. Maltose-neopentyl glycol (MNG) amphiphiles for

- 459 solubilization, stabilization and crystallization of membrane proteins. *Nat. Methods*  
460 **7**:1003-1008. 10.1038/nmeth.1526
- 461 Contreras-Gomez A, Sanchez-Miron A, Garcia-Camacho F, Molina-Grima E, Chisti Y 2014.  
462 Protein production using the baculovirus-insect cell expression system. *Biotechnol.*  
463 *Prog.* **30**:1-18. 10.1002/btpr.1842
- 464 Crichton PG, Lee Y, Ruprecht JJ, Cerson E, Thangaratnarajah C, King MS, Kunji ERS 2015.  
465 Trends in thermostability provide information on the nature of substrate, inhibitor,  
466 and lipid interactions with mitochondrial carriers. *J. Biol. Chem.* **290**:8206-8217.  
467 10.1074/jbc.M114.616607
- 468 Deng D, Sun P, Yan C, Ke M, Jiang X, Xiong L, Ren W, Hirata K, Yamamoto M, Fan S, Yan N  
469 2015. Molecular basis of ligand recognition and transport by glucose transporters.  
470 *Nature* **526**:391-6. 10.1038/nature14655
- 471 Deng D, Xu C, Sun P, Wu J, Yan C, Hu M, Yan N 2014. Crystal structure of the human  
472 glucose transporter GLUT1. *Nature* **510**:121-5. 10.1038/nature13306
- 473 Elbourne LD, Tetu SG, Hassan KA, Paulsen IT 2017. TransportDB 2.0: a database for  
474 exploring membrane transporters in sequenced genomes from all domains of life.  
475 *Nucleic Acids Res* **45**:D320-D324. 10.1093/nar/gkw1068
- 476 Fauman EB, Rai BK, Huang ES 2011. Structure-based druggability assessment--identifying  
477 suitable targets for small molecule therapeutics. *Curr. Opin. Chem. Biol.* **15**:463-  
478 468. 10.1016/j.cbpa.2011.05.020
- 479 Goehring A, Lee C-H, Wang KH, Michel JC, Claxton DP, Bacongus I, Althoff T, Fischer S,  
480 Garcia KC, Gouaux E 2014. Screening and large-scale expression of membrane  
481 proteins in mammalian cells for structural studies. *Nat. Protocols* **9**:2574-2585.  
482 10.1038/nprot.2014.173
- 483 Hediger MA, Clemencon B, Burrier RE, Bruford EA 2013. The ABCs of membrane  
484 transporters in health and disease (SLC series): introduction. *Mol. Aspects Med.*  
485 **34**:95-107. 10.1016/j.mam.2012.12.009

- 486 Henderson PJ 1977. The multiplicity of components, energization mechanisms and  
487 functions involved in galactose transport into *Escherichia coli*. *Biochem. Soc. Trans.*  
488 **5**:25-8.
- 489 Henderson PJ, Giddens RA, Jones-Mortimer MC 1977. Transport of galactose, glucose and  
490 their molecular analogues by *Escherichia coli* K12. *Biochem. J.* **162**:309-320.
- 491 Henderson PJ, Maiden MC 1990. Homologous sugar transport proteins in *Escherichia coli*  
492 and their relatives in both prokaryotes and eukaryotes. *Philos. Trans. R. Soc. Lond.*  
493 *B Biol. Sci.* **326**:391-410.
- 494 Kanehisa M, Furumichi M, Tanabe M, Sato Y, Morishima K 2017. KEGG: new perspectives  
495 on genomes, pathways, diseases and drugs. *Nucleic Acids Res* **45**:D353-D361.  
496 10.1093/nar/gkw1092
- 497 King MS, Boes C, Kunji ERS 2015. Membrane Protein Expression in *Lactococcus lactis*.  
498 *Methods Enzymol.* **556**:77-97. 10.1016/bs.mie.2014.12.009
- 499 King MS, Kerr M, Crichton PG, Springett R, Kunji ER 2016. Formation of a cytoplasmic salt  
500 bridge network in the matrix state is a fundamental step in the transport  
501 mechanism of the mitochondrial ADP/ATP carrier. *Biochim. Biophys. Acta* **1857**:14-  
502 22. 10.1016/j.bbabi.2015.09.013
- 503 Krishnamurthy H, Piscitelli CL, Gouaux E 2009. Unlocking the molecular secrets of sodium-  
504 coupled transporters. *Nature* **459**:347-55. 10.1038/nature08143
- 505 Kunji ERS 2012. Structural and Mechanistic Aspects of Mitochondrial Transport Proteins.  
506 *In: FERGUSON, S. (ed.) Comprehensive Biophysics*. Elsevier.
- 507 Kunji ERS, Harding M 2003. Projection structure of the atractyloside-inhibited  
508 mitochondrial ADP/ATP carrier of *Saccharomyces cerevisiae*. *J. Biol. Chem.*  
509 **278**:36985-36988.
- 510 Kunji ERS, Robinson AJ 2006. The conserved substrate binding site of mitochondrial  
511 carriers. *Biochim. Biophys. Acta* **1757**:1237-1248. 10.1016/j.bbabi.2006.03.021
- 512 Kunji ERS, Robinson AJ 2010. Coupling of proton and substrate translocation in the  
513 transport cycle of mitochondrial carriers. *Curr. Opin. Struct. Biol.* **20**:440-7.  
514 10.1016/j.sbi.2010.06.004

- 515 Lin L, Yee SW, Kim RB, Giacomini KM 2015. SLC transporters as therapeutic targets:  
516 emerging opportunities. *Nat. Rev. Drug Discov.* **14**:543-560. 10.1038/nrd4626
- 517 Mcdonald TP, Henderson PJ 2001. Cysteine residues in the D-galactose-H<sup>+</sup> symport  
518 protein of *Escherichia coli*: effects of mutagenesis on transport, reaction with N-  
519 ethylmaleimide and antibiotic binding. *Biochem. J.* **353**:709-717.
- 520 Mifsud J, Ravaud S, Krammer EM, Chipot C, Kunji ERS, Pebay-Peyroula E, Dehez F 2013.  
521 The substrate specificity of the human ADP/ATP carrier AAC1. *Mol. Membr. Biol.*  
522 **30**:160-168. Doi 10.3109/09687688.2012.745175
- 523 Nomura N, Verdon G, Kang HJ, Shimamura T, Nomura Y, Sonoda Y, Hussien SA, Qureshi  
524 AA, Coincon M, Sato Y, Abe H, Nakada-Nakura Y, Hino T, Arakawa T, Kusano-Arai O,  
525 Iwanari H, Murata T, Kobayashi T, Hamakubo T, Kasahara M, Iwata S, Drew D 2015.  
526 Structure and mechanism of the mammalian fructose transporter GLUT5. *Nature*  
527 **526**:397-401. 10.1038/nature14909
- 528 Pao SS, Paulsen IT, Saier MH, Jr. 1998. Major facilitator superfamily. *Microbiol. Mol. Biol.*  
529 *Rev.* **62**:1-34.
- 530 Ramirez-Gaona M, Marcu A, Pon A, Guo AC, Sajed T, Wishart NA, Karu N, Djoumbou  
531 Feunang Y, Arndt D, Wishart DS 2017. YMDB 2.0: a significantly expanded version  
532 of the yeast metabolome database. *Nucleic Acids Res.* **45**:D440-D445.  
533 10.1093/nar/gkw1058
- 534 Rask-Andersen M, Masuram S, Fredriksson R, Schioth HB 2013. Solute carriers as drug  
535 targets: current use, clinical trials and prospective. *Mol. Aspects Med.* **34**:702-10.  
536 10.1016/j.mam.2012.07.015
- 537 Robinson AJ, Kunji ERS 2006. Mitochondrial carriers in the cytoplasmic state have a  
538 common substrate binding site. *Proc. Natl. Acad. Sci. U.S.A.* **103**:2617-2622.
- 539 Routledge SJ, Mikaliunaite L, Patel A, Clare M, Cartwright SP, Bawa Z, Wilks MDB, Low F,  
540 Hardy D, Rothnie AJ, Bill RM 2016. The synthesis of recombinant membrane  
541 proteins in yeast for structural studies. *Methods* **95**:26-37.  
542 10.1016/j.ymeth.2015.09.027



- 543 Runswick MJ, Powell SJ, Nyren P, Walker JE 1987. Sequence of the bovine mitochondrial  
544 phosphate carrier protein: structural relationship to ADP/ATP translocase and the  
545 brown fat mitochondria uncoupling protein. *EMBO J.* **6**:1367-1373.
- 546 Sajed T, Marcu A, Ramirez M, Pon A, Guo AC, Knox C, Wilson M, Grant JR, Djoumbou Y,  
547 Wishart DS 2016. ECMDDB 2.0: A richer resource for understanding the  
548 biochemistry of *E. coli*. *Nucleic Acids Res.* **44**:D495-D501. 10.1093/nar/gkv1060
- 549 Shimamura T, Weyand S, Beckstein O, Rutherford NG, Hadden JM, Sharples D, Sansom  
550 MS, Iwata S, Henderson PJ, Cameron AD 2010. Molecular basis of alternating  
551 access membrane transport by the sodium-hydantoin transporter Mhp1. *Science*  
552 **328**:470-3. 328/5977/470 [pii]  
553 10.1126/science.1186303
- 554 Simmons KJ, Jackson SM, Brueckner F, Patching SG, Beckstein O, Ivanova E, Geng T,  
555 Weyand S, Drew D, Lanigan J, Sharples DJ, Sansom MS, Iwata S, Fishwick CW,  
556 Johnson AP, Cameron AD, Henderson PJ 2014. Molecular mechanism of ligand  
557 recognition by membrane transport protein, Mhp1. *EMBO J.* **33**:1831-1844.  
558 10.15252/embj.201387557
- 559 Smith AC, Robinson AJ 2011. A metabolic model of the mitochondrion and its use in  
560 modelling diseases of the tricarboxylic acid cycle. *BMC Syst Biol* **5**:102.  
561 10.1186/1752-0509-5-102
- 562 Smith AC, Robinson AJ 2016. MitoMiner v3.1, an update on the mitochondrial proteomics  
563 database. *Nucleic Acids Res* **44**:D1258-61. 10.1093/nar/gkv1001
- 564 Stark MJ 1987. Multicopy expression vectors carrying the lac repressor gene for regulated  
565 high-level expression of genes in *Escherichia coli*. *Gene* **51**:255-267.
- 566 Suzuki S, Henderson PJ 2006. The hydantoin transport protein from *Microbacterium*  
567 *liquefaciens*. *J. Bacteriol.* **188**:3329-3336. 10.1128/JB.188.9.3329-3336.2006
- 568 The Gene Ontology C 2017. Expansion of the Gene Ontology knowledgebase and  
569 resources. *Nucleic Acids Res* **45**:D331-D338. 10.1093/nar/gkw1108
- 570 Thul PJ, Akesson L, Wiking M, Mahdessian D, Geladaki A, Ait Blal H, Alm T, Asplund A,  
571 Bjork L, Breckels LM, Backstrom A, Danielsson F, Fagerberg L, Fall J, Gatto L, Gnann

572 C, Hober S, Hjelmare M, Johansson F, Lee S, Lindskog C, Mulder J, Mulvey CM,  
573 Nilsson P, Oksvold P, Rockberg J, Schutten R, Schwenk JM, Sivertsson A, Sjostedt E,  
574 Skogs M, Stadler C, Sullivan DP, Tegel H, Winsnes C, Zhang C, Zwahlen M,  
575 Mardinoglu A, Ponten F, Von Feilitzen K, Lilley KS, Uhlen M, Lundberg E 2017. A  
576 subcellular map of the human proteome. *Science* **356**. 10.1126/science.aal3321  
577 Vastermark A, Saier MH, Jr. 2014. Evolutionary relationship between 5+5 and 7+7 inverted  
578 repeat folds within the amino acid-polyamine-organocation superfamily. *Proteins*  
579 **82**:336-46. 10.1002/prot.24401  
580 Walmsley AR, Martin GE, Henderson PJ 1994. 8-Anilino-1-naphthalenesulfonate is a  
581 fluorescent probe of conformational changes in the D-galactose-H<sup>+</sup> symport  
582 protein of *Escherichia coli*. *J. Biol. Chem.* **269**:17009-19.  
583 Ward A, O'reilly J, Rutherford NG, Ferguson SM, Hoyle CK, Palmer SL, Clough JL, Venter H,  
584 Xie H, Litherland GJ, Martin GE, Wood JM, Roberts PE, Groves MA, Liang WJ, Steel  
585 A, Mckeown BJ, Henderson PJ 1999. Expression of prokaryotic membrane  
586 transport proteins in *Escherichia coli*. *Biochem. Soc. Trans.* **27**:893-899.  
587 Wishart DS, Jewison T, Guo AC, Wilson M, Knox C, Liu Y, Djoumbou Y, Mandal R, Aziat F,  
588 Dong E, Bouatra S, Sinelnikov I, Arndt D, Xia J, Liu P, Yallou F, Bjorndahl T, Perez-  
589 Pineiro R, Eisner R, Allen F, Neveu V, Greiner R, Scalbert A 2013. HMDB 3.0--The  
590 Human Metabolome Database in 2013. *Nucleic Acids Res.* **41**:D801-D807.  
591 10.1093/nar/gks1065  
592 Yamashita A, Singh SK, Kawate T, Jin Y, Gouaux E 2005. Crystal structure of a bacterial  
593 homologue of Na (+)/Cl (-)-dependent neurotransmitter transporters. *Nature*.  
594 Yan N 2017. A Glimpse of Membrane Transport through Structures-Advances in the  
595 Structural Biology of the GLUT Glucose Transporters. *J. Mol. Biol.* **429**:2710-2725.  
596 10.1016/j.jmb.2017.07.009  
597 Zerbino DR, Achuthan P, Akanni W, Amode MR, Barrell D, Bhai J, Billis K, Cummins C, Gall  
598 A, Giron CG, Gil L, Gordon L, Haggerty L, Haskell E, Hourlier T, Izuogu OG, Janacek  
599 SH, Juettemann T, To JK, Laird MR, Lavidas I, Liu Z, Loveland JE, Maurel T, McLaren  
600 W, Moore B, Mudge J, Murphy DN, Newman V, Nuhn M, Ogeh D, Ong CK, Parker A,

601 Patricio M, Riat HS, Schuilenburg H, Sheppard D, Sparrow H, Taylor K, Thormann A,  
602 Vullo A, Walts B, Zadissa A, Frankish A, Hunt SE, Kostadima M, Langridge N, Martin  
603 FJ, Muffato M, Perry E, Ruffier M, Staines DM, Trevanion SJ, Aken BL, Cunningham  
604 F, Yates A, Flicek P 2018. Ensembl 2018. *Nucleic Acids Res* **46**:D754-D761.  
605 [10.1093/nar/gkx1098](https://doi.org/10.1093/nar/gkx1098)  
606  
607  
608

609 Figures

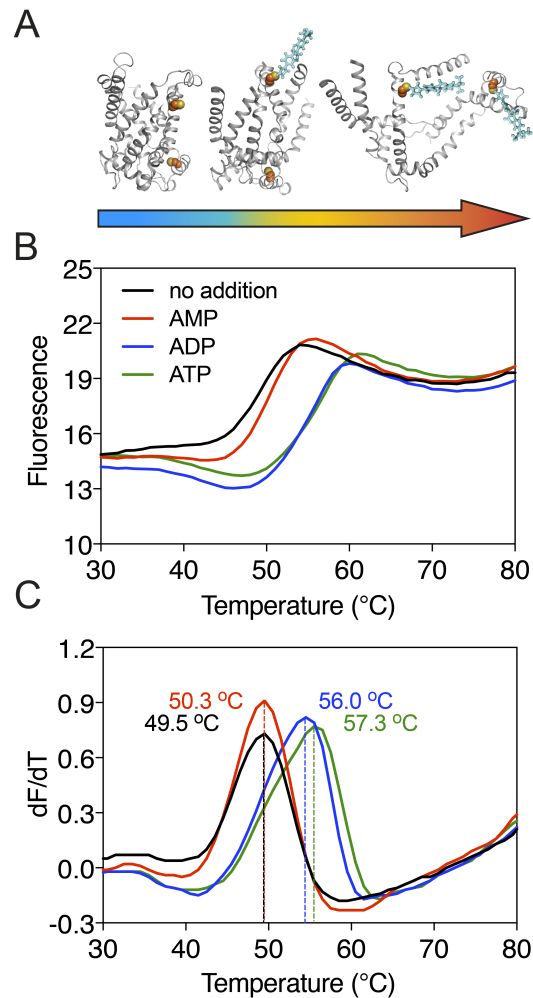

610

611 **Figure 1. Substrate-induced stabilization of a mitochondrial ADP/ATP carrier.** (a) As  
612 protein molecules in a population unfold due to a gradual rise in temperature (25 – 90 °C),  
613 buried cysteine residues become solvent-exposed and accessible to the thiol-specific probe  
614 CPM (blue stick representation) that becomes fluorescent upon reaction. (b) Typical  
615 unfolding curves of the mitochondrial ADP/ATP carrier of *Thermothelomyces thermophila*  
616 (2 µg) in the absence and presence of AMP, ADP and ATP, shown in red, blue and green,  
617 respectively. (c) The apparent melting temperature (T<sub>m</sub>) is the peak in the derivative of the  
618 unfolding curve (dF/dT) (below), which is used as an indicator of thermal stability. The  
619 apparent melting temperatures reported in the text are from three independent protein  
620 purifications.

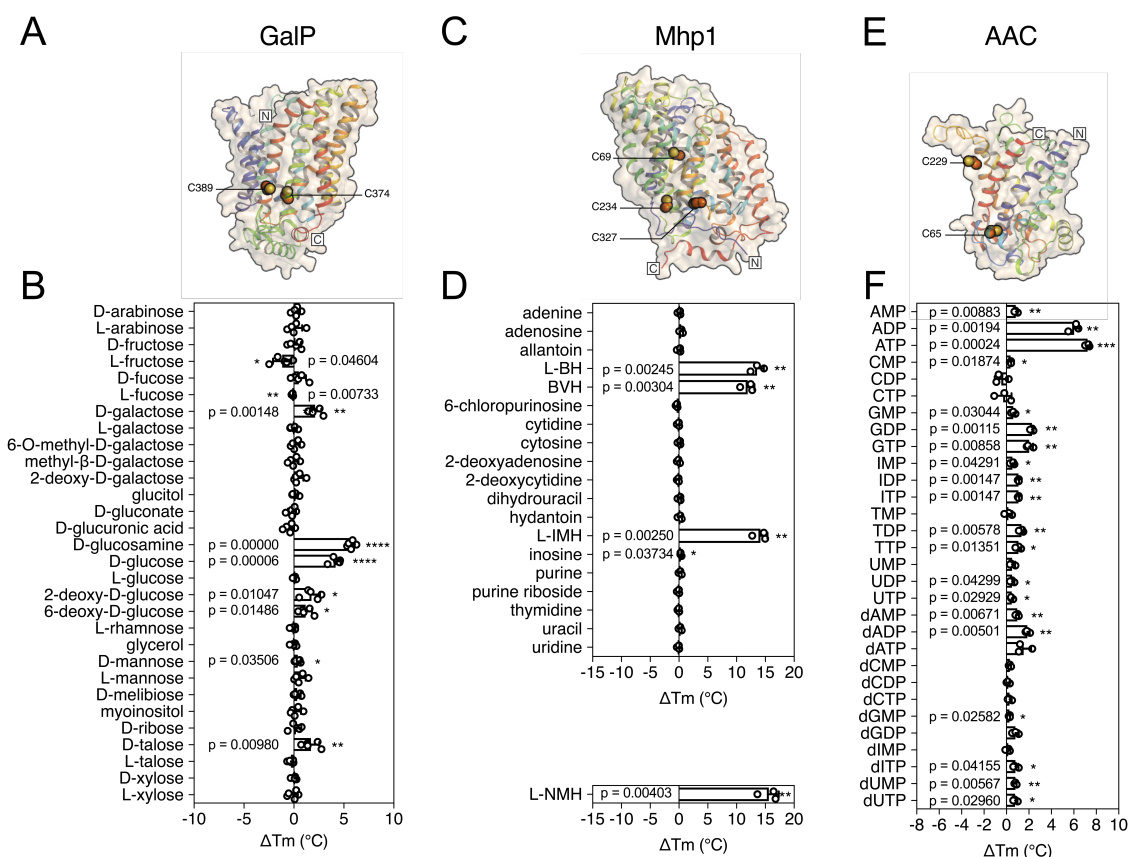

621

622 **Figure 2. Validation of the method for determining substrate specificity using three**  
 623 **unrelated proteins. (a), (c) and (e) Structural models of GalP (based on GLUT5, PDB 4YBQ),**  
 624 **Mhp1 (PDB 2JLN) and AAC (based on Aac2p, PDB 4C9G), respectively. The models are shown**  
 625 **in rainbow cartoon and wheat surface representations. Cysteine residues are shown as**  
 626 **spheres, except for Cys-19 of GalP, which could not be modeled. (b), (d) and (f)**  
 627 **Thermostability screen of GalP (3  $\mu$ g), Mhp1 (3  $\mu$ g) and AAC (2  $\mu$ g) against sugar, nucleobase**  
 628 **and nucleotide libraries, respectively. The temperature shift ( $\Delta T_m$ ) is the apparent melting**  
 629 **temperature in the presence of compound minus the apparent melting temperature in the**  
 630 **absence of compound. The data are represented by the standard deviation of five, three**  
 631 **and three independent repeats, respectively. Two-tailed Student's *t*-tests assuming unequal**  
 632 **variances were performed for the significance analysis (0.05 < *p*-value: not significant;**  
 633 **0.01 < *p*-value < 0.05: \*; 0.001 < *p*-value < 0.01: \*\*; 0.0001 < *p*-value < 0.001: \*\*\*; *p*-**  
 634 **value < 0.0001: \*\*\*\*). L-BH, 5-benzyl-L-hydantoin; BVH, 5-bromovinylhydantoin; L-IMH, 5-**  
 635 **indolylmethyl-L-hydantoin, L-NMH 5-(2-naphthylmethyl)-L-hydantoin.**

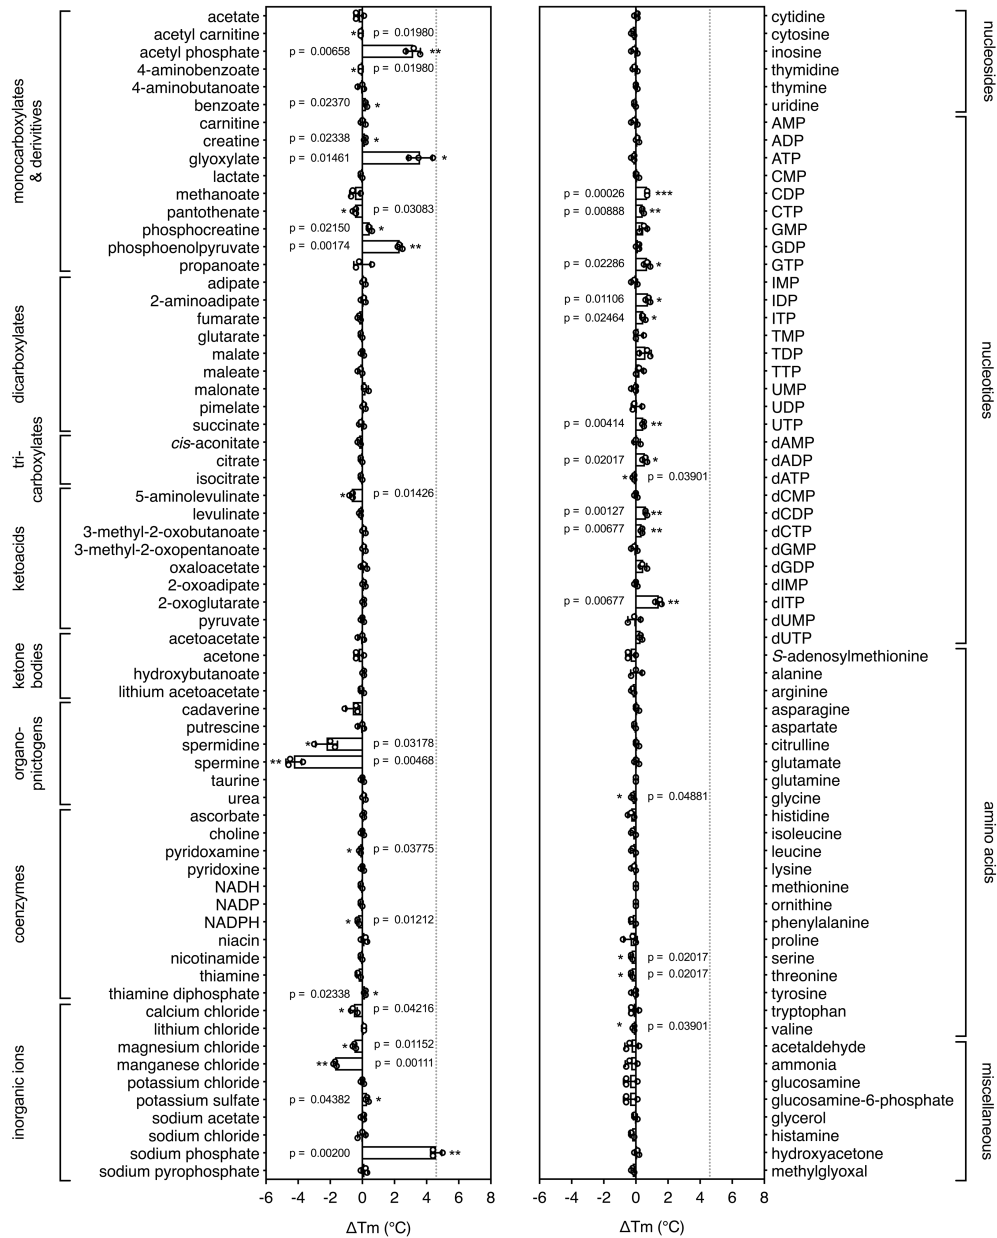

636

637 **Figure 3. Identification of substrates for a mitochondrial phosphate carrier from the**  
 638 **thermophilic ciliate *Tetrahymena thermophila*.** Purified carrier (1  $\mu$ g) in lauryl maltose  
 639 neopentyl glycol was incubated at pH 6.0 with each library compound separately and the  
 640  $\Delta T_m$  was determined, which is the difference between the apparent melting temperatures  
 641 in the presence and absence of the tested compound. The data are represented by the  
 642 average and standard deviation of three independent assays. The significance tests were  
 643 performed as described in the legend to Fig. 2.

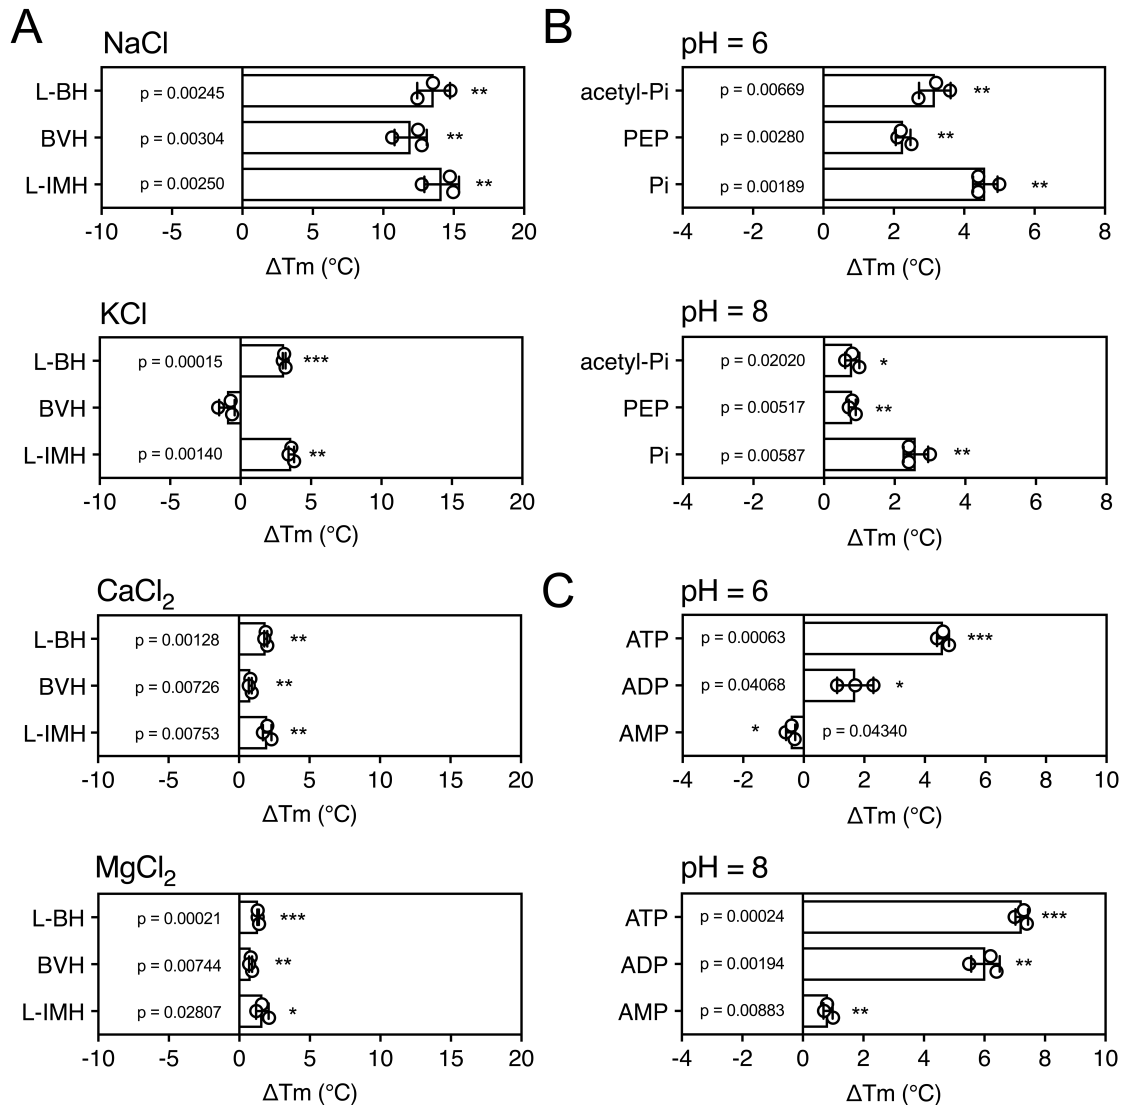

644

645 **Figure 4. The effect of coupling ions on the stabilization of transporters by substrate**

646 **binding. (a)** Thermostability shifts of Mhp1 (3  $\mu$ g) induced by binding of hydantoin in the

647 presence of NaCl, KCl, CaCl<sub>2</sub> and MgCl<sub>2</sub>. L-BH: 5-benzyl-L-hydantoin, BVH: 5-

648 bromovinylhydantoin, L-IMH: 5-indolmethyl-L-hydantoin. (b) Thermostability shifts of the

649 phosphate carrier (1  $\mu$ g) induced by binding of phosphate-containing compounds at pH 6.0

650 and 8.0. Acetyl-Pi: acetyl-phosphate, Pi: phosphate. (c) Thermostability shifts of the (2  $\mu$ g)

651 induced by ADP and ATP binding at pH 6.0 and 8.0, using AMP as control.

652

653

654

655 **Supplementary information**

656 **Screening of candidate substrates and coupling ions of**  
657 **transporters by thermostability shift assays**

658

659 Homa Majd<sup>1</sup>, Martin S. King<sup>1</sup>, Shane M. Palmer<sup>1</sup>, Anthony C. Smith<sup>1</sup>, Liam D.H. Elbourne<sup>3</sup>,  
660 Ian T. Paulsen<sup>3</sup>, David Sharples<sup>2</sup>, Peter J. F. Henderson<sup>2</sup>, Edmund R. S. Kunji<sup>1, \*</sup>

661

662 <sup>1</sup>Medical Research Council Mitochondrial Biology Unit, University of Cambridge, Wellcome  
663 Trust/MRC Building, Cambridge Biomedical Campus, Hills Road, Cambridge, CB2 0XY, United  
664 Kingdom

665 <sup>2</sup>Astbury Centre for Structural Molecular Biology and School of BioMedical Sciences,  
666 University of Leeds, Leeds, LS2 9JT, United Kingdom

667 <sup>3</sup>Department of Molecular Sciences, Macquarie University, Sydney, NSW 2109, Australia

668



669 **Supplementary Table**

670 **Supplementary Table 1. Status of predictions of transport protein substrate specificity in**  
 671 **representative archaeal, eubacterial and eukaryotic species (April 2018).**

| <b>Genus</b>          | <b>Species</b>      | <b>Transporter<br/>Proteins</b> | <b>Proteins<br/>with no<br/>predicted<br/>substrate</b> | <b>Percentage</b> |
|-----------------------|---------------------|---------------------------------|---------------------------------------------------------|-------------------|
| <i>Acinetobacter</i>  | <i>baumannii</i>    | 391                             | 75                                                      | 19%               |
| <i>Arabidopsis</i>    | <i>thaliana</i>     | 1279                            | 311                                                     | 24%               |
| <i>Caenorhabditis</i> | <i>elegans</i>      | 669                             | 179                                                     | 27%               |
| <i>Campylobacter</i>  | -                   | 197                             | 37                                                      | 19%               |
| <i>Drosophila</i>     | <i>melanogaster</i> | 662                             | 105                                                     | 16%               |
| <i>Enterococcus</i>   | <i>faecium</i>      | 392                             | 44                                                      | 11%               |
| <i>Escherichia</i>    | <i>coli</i>         | 638                             | 120                                                     | 19%               |
| <i>Halobacterium</i>  | -                   | 208                             | 10                                                      | 5%                |
| <i>Helicobacter</i>   | <i>pylori</i>       | 140                             | 33                                                      | 24%               |
| <i>Homo</i>           | <i>sapiens</i>      | 1472                            | 102                                                     | 7%                |
| <i>Klebsiella</i>     | <i>pneumoniae</i>   | 879                             | 164                                                     | 19%               |
| <i>Neisseria</i>      | <i>gonorrhoeae</i>  | 172                             | 32                                                      | 19%               |
| <i>Oryza</i>          | <i>sativa</i>       | 1285                            | 165                                                     | 13%               |
| <i>Pseudomonas</i>    | <i>aeruginosa</i>   | 703                             | 147                                                     | 21%               |
| <i>Saccharomyces</i>  | <i>cerevisiae</i>   | 343                             | 126                                                     | 37%               |
| <i>Salmonella</i>     | -                   | 605                             | 113                                                     | 19%               |
| <i>Shigella</i>       | -                   | 534                             | 95                                                      | 18%               |
| <i>Staphylococcus</i> | <i>aureus</i>       | 348                             | 41                                                      | 12%               |
| <i>Streptococcus</i>  | <i>pneumoniae</i>   | 307                             | 50                                                      | 16%               |
| <i>Sulfolobus</i>     | -                   | 205                             | 18                                                      | 9%                |
| <i>Vibrio</i>         | <i>cholerae</i>     | 458                             | 82                                                      | 18%               |
|                       | <b>Total</b>        | <b>11886</b>                    | <b>2048</b>                                             | <b>18%</b>        |

672

673

674 **Supplementary Figures**

675

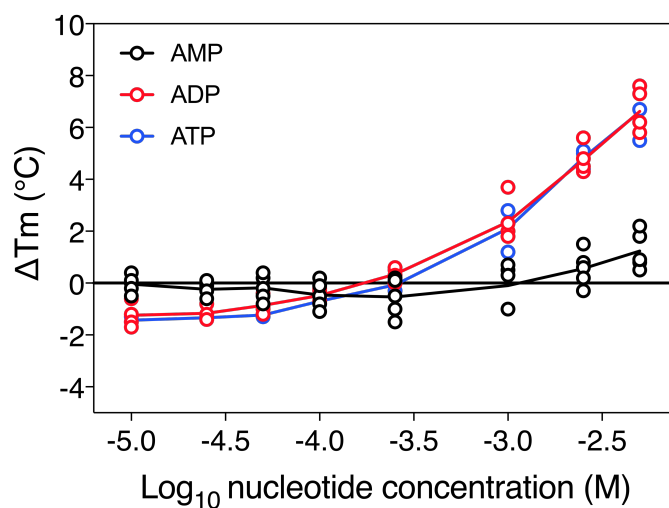

676

677

678 **Supplementary Figure 1. The substrate concentration-dependency of the apparent**  
679 **melting temperature of purified mitochondrial ADP/ATP carrier.** The apparent melting  
680 temperature ( $T_m$ ) was determined from the peak in the derivative of the unfolding curve for  
681 different concentrations of AMP, ADP, and ATP in 20 mM HEPES pH 8.0, 100 mM NaCl, 0.1  
682 % dodecyl-maltoside, 0.1 mg ml<sup>-1</sup> tetraoleoyl cardiolipin. The data are represented by the  
683 average and standard deviation of three biological repeats.

684

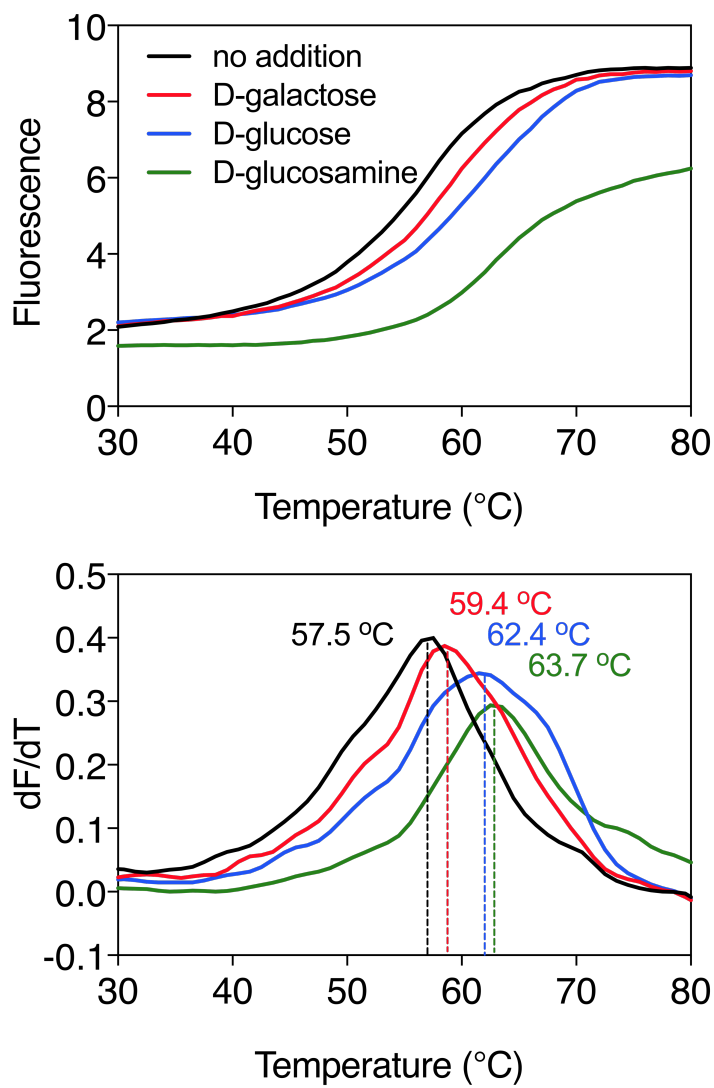

685

686 **Supplementary Figure 2. Substrate-induced stabilization of the galactose transporter**  
687 **GalP.** Typical thermostability profiles of purified GalP (**top**) and their derivatives (dF/dT;  
688 **bottom**) in the absence and presence of stabilizing substrates D-galactose (red trace), D-  
689 glucose (blue trace) and glucosamine (green trace), which was also causing a significant  
690 shift. The apparent melting temperature ( $T_m$ ) is the peak in the derivative of the unfolding  
691 curve (dF/dT) and is indicated for each curve. For each reaction, 2.5  $\mu$ g purified protein was  
692 assayed in the presence of 50 mM compound. The apparent melting temperature reported  
693 in the text is from five independent protein purifications.  
694

695

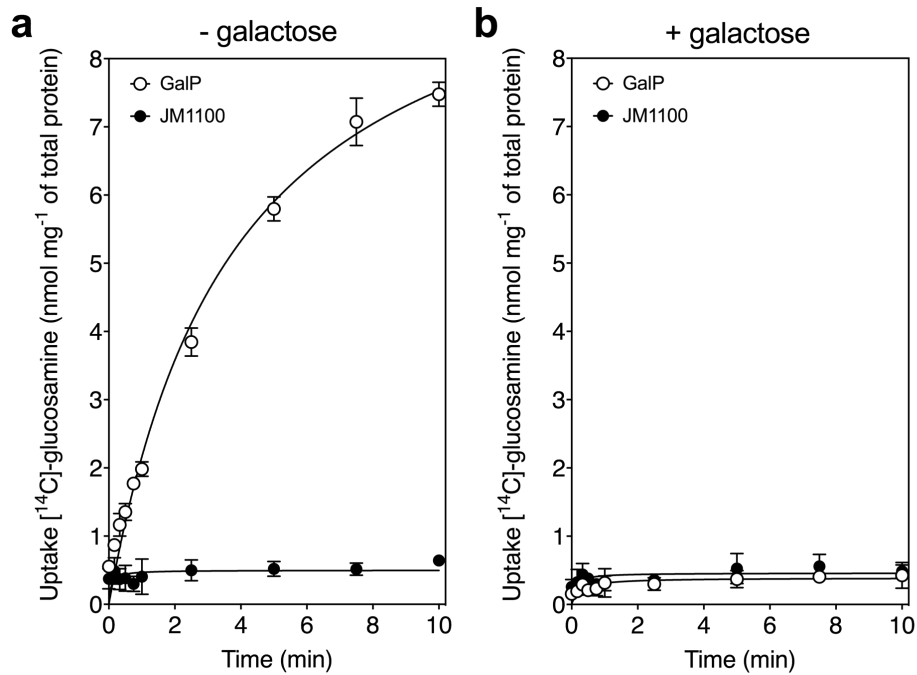

696

697

698 **Supplementary Figure 3. Glucosamine is a transported substrate of the galactose**  
699 **transporter GalP.** Transport assays with [<sup>14</sup>C]-labeled D-glucosamine in whole cells of the  
700 GalP-expressing plasmid pGP1 in the host *E. coli* strain JM1100 (open circles) and control  
701 JM1100 without plasmid (closed circles). Transport in (a) the absence or (b) presence of  
702 4,000-fold excess of unlabeled D-galactose as described in the “Transport assays” section.  
703 The data are represented by the average and the standard deviation of four technical  
704 repeats.

705

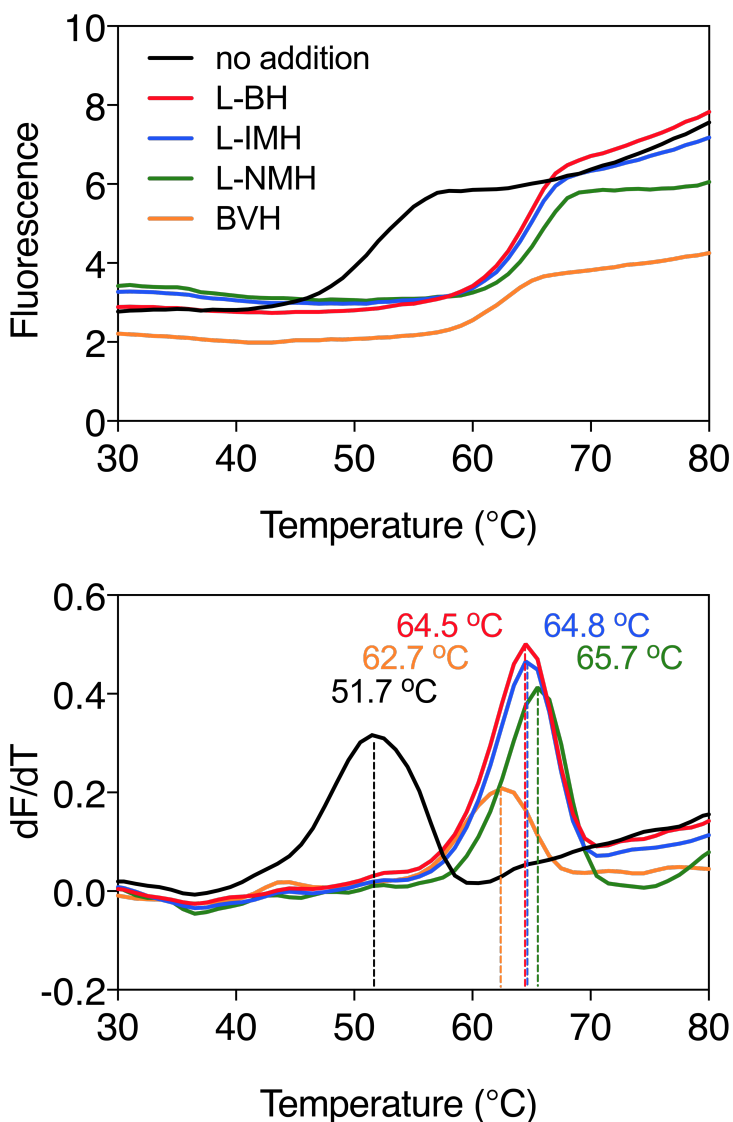

706

707 **Supplementary Figure 4. Ligand-induced stabilization of Mhp1 in the presence of sodium**  
708 **ions.** Typical thermostability profiles of purified Mhp1 (**top**) and their derivatives (dF/dT;  
709 **bottom**) in the absence or presence of stabilizing compounds 5-benzyl-L-hydantoin (L-BH,  
710 red trace), 5-indolylmethyl-L-hydantoin (L-IMH, blue trace), 5-(2-naphthylmethyl)-L-  
711 hydantoin (L-NMH, green trace) and 5-bromovinylhydantoin (BVH, orange trace). The  
712 apparent melting temperature ( $T_m$ ) is the peak in the derivative of the unfolding curve  
713 (dF/dT) and is indicated for each curve. For each reaction, 2.5  $\mu$ g purified protein was  
714 assayed in the presence of 140 mM NaCl and 2 mM compound in buffer containing 10 mM  
715 Tris-HCl pH 8.0, 2.5% glycerol and 0.05% dodecyl-maltoside. The apparent melting  
716 temperature reported in the text is from three independent protein purifications.

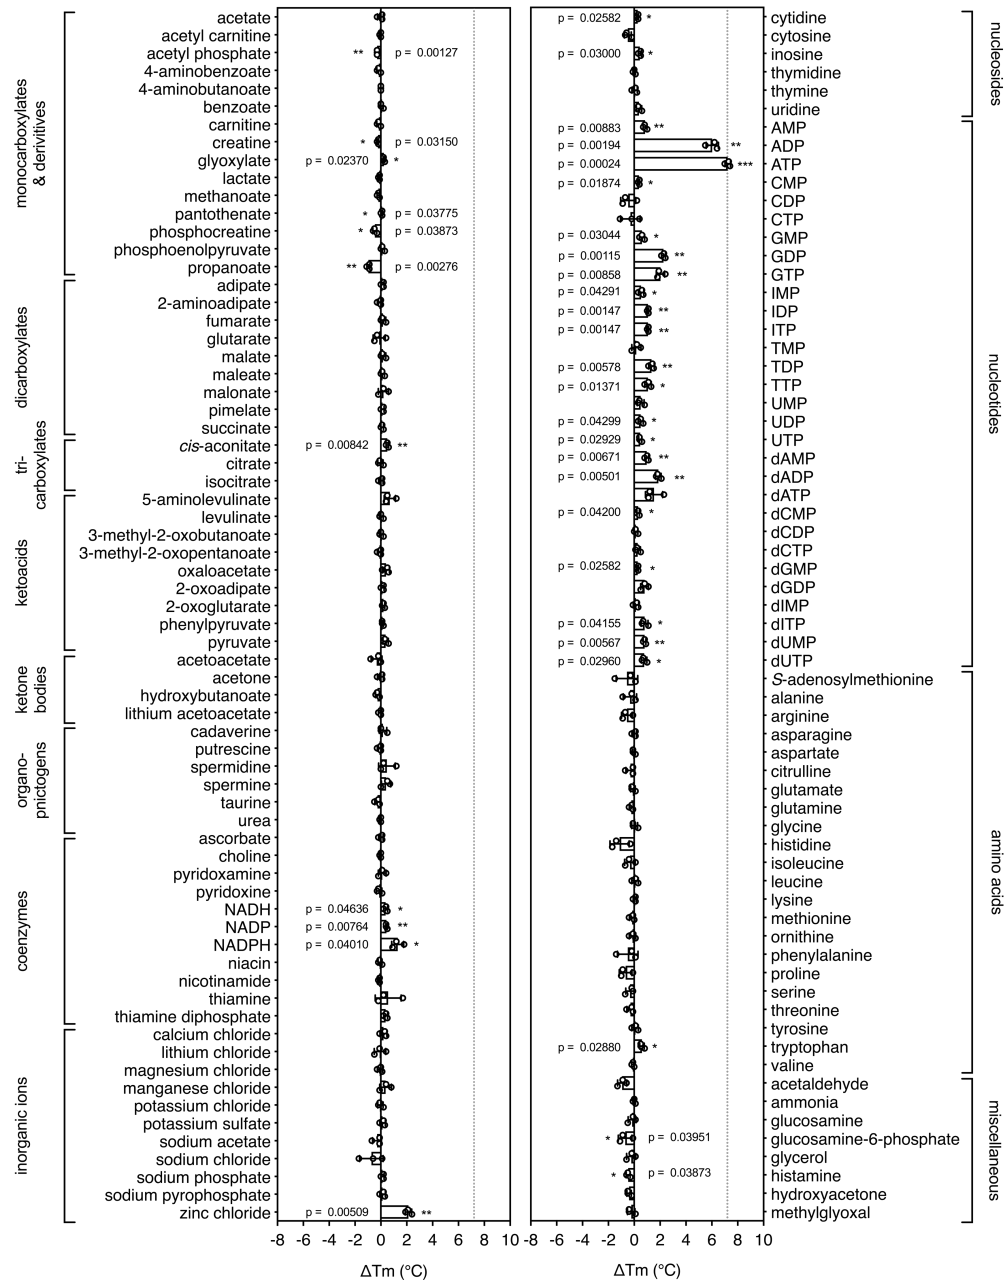

717

718 **Supplementary Figure 5. Substrate screening of the mitochondrial ADP/ATP carrier.**

719 Purified ADP/ATP carrier in dodecyl-maltoside was separately mixed with 2.5 mM of library  
 720 compounds in 20 mM HEPES pH 8.0, 100 mM NaCl, 0.1 % dodecyl-maltoside, 0.1 mg ml<sup>-1</sup>  
 721 tetraoleoyl cardiolipin and subjected to a melting regime. The shifts in the apparent T<sub>m</sub> (see  
 722 Online Methods) were recorded and are shown as bars. The data are represented by the  
 723 average and standard deviation of three independent assays. The significance tests were  
 724 carried out as in **Figure 2**.

725

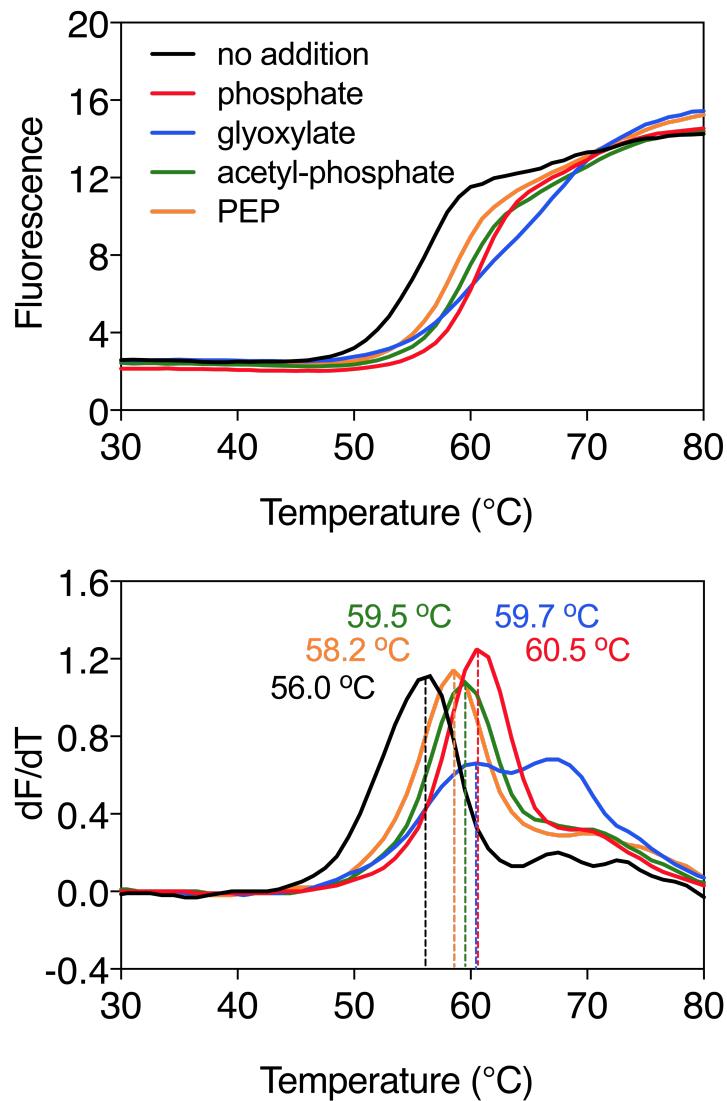

726

727 **Supplementary Figure 6. Substrate-induced stabilization of the mitochondrial phosphate**

728 **carrier.** Typical thermostability curves of purified phosphate carrier (**top**) and their

729 derivatives (dF/dT; **bottom**) in the absence and presence of stabilizing compounds

730 phosphate (PEP, red trace), glyoxylate (blue trace), acetyl-phosphate (green trace) and

731 phosphoenolpyruvate (orange trace). The apparent melting temperature ( $T_m$ ) is the peak in

732 the derivative of the unfolding curve (dF/dT) and is indicated for each curve. For each

733 reaction, 2  $\mu\text{g}$  purified protein was assayed in the presence of 2.5 mM compound in 20 mM

734 MES pH 6.0, 100 mM NaCl, 0.1 % lauryl maltose neopentyl glycol, 0.1 mg ml<sup>-1</sup> tetraoleoyl

735 cardiolipin. The apparent melting temperatures reported in the text are from three

736 independent protein purifications.

737

738

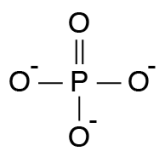

phosphate

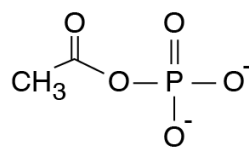

acetyl phosphate

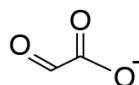

glyoxylate

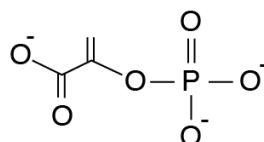

phosphoenolpyruvate

739

740

741

742

743

**Supplementary Figure 7.** Chemical structures of compounds that showed significant thermostability shifts with the mitochondrial phosphate carrier.
